# Supplementary material for: Tear proteomics reveals the molecular basis of the efficacy of human recombinant nerve growth factor treatment for Neurotrophic Keratopathy
Source: PubMed Central journal article supplement (PMC8786855; doi:10.1038/s41598-022-05229-4), 2022-01-24

**SUPPLEMENTARY MATERIALS OF:**

## **Tear proteomics reveals the molecular basis of the efficacy of human recombinant nerve growth factor treatment for Neurotrophic Keratopathy**

Damiana Pieragostino<sup>1,2,\*</sup>, Manuela Lanzini<sup>3,4</sup>, Iaria Cicalini<sup>1,3</sup>, Maria Concetta Cufaro<sup>1,5</sup>, Verena Damiani<sup>1,2</sup>, Leonardo Mastropasqua<sup>3,4</sup>, Vincenzo De Laurenzi<sup>1,2</sup>, Mario Nubile<sup>3,4</sup>, Paola Lanuti<sup>1,3</sup>, Giuseppina Bologna<sup>1,3</sup>, Luca Agnifili<sup>3,4</sup> and Piero Del Boccio<sup>1,5</sup>

<sup>1</sup>Center for Advanced Studies and Technology (CAST), University "G. d'Annunzio" of Chieti-Pescara, Italy.

<sup>2</sup>Department of Innovative Technologies in Medicine and Dentistry, University "G. d'Annunzio" of Chieti-Pescara, Italy.

<sup>3</sup>Department of Medicine and Aging Science, "G. d'Annunzio" University of Chieti-Pescara, Italy.

<sup>4</sup>Ophthalmology Clinic, National Centre of High Technology (CNAT) in Ophthalmology, University of "G. d'Annunzio", Chieti-Pescara, Italy.

<sup>5</sup>Department of Pharmacy, University "G. d'Annunzio" of Chieti-Pescara, Chieti, Italy.

\*Correspondence to:

Dr. Damiana Pieragostino

University "G. d'Annunzio" of Chieti-Pescara

Department of Innovative Technologies in Medicine and Dentistry

Via dei Vestini n. 31 66100 CHIETI

Tel. +39-0871-541593

e-mail: [damiana.pieragostino@unich.it](mailto:damiana.pieragostino@unich.it)

**Keywords:** Proteomics; Tear; Neurotrophic Keratopathy; NGF; Extracellular Vesicles.

**Table S1: List of flow cytometry specificities and reagents.**

| Detection                     | Fluorochrome | Vendor         | Ab Clone | Catalog                | Amount per Test               |
|-------------------------------|--------------|----------------|----------|------------------------|-------------------------------|
| Phalloidin                    | FITC         | BD Biosciences | -        | 626267<br>(Custom kit) | 0.5 (stock 0.2 mg/ml in DMSO) |
| Lipophilic Cationic Dye (LCD) | -            | BD Biosciences | -        | 626267<br>(Custom kit) | 0.5 (stock 0.4 mM in DMSO)    |
| CD45                          | APC-H7       | BD Biosciences | 2D1      | 560178                 | 2 $\mu$ l                     |
| CD126                         | V510         | BD Biosciences | OKT4     | 740137                 | 0.5 $\mu$ l                   |
| CD171                         | BV421        | BD Biosciences | 5G3      | 565732                 | 1.5 $\mu$ l                   |

Keys: R-phycoerythrin (PE); PE-Cyanine 7 (Cy7), Allophycocyanin-Hilite®7 (APC-H7), Brilliant Violet (BV). Becton Dickinson (BD) Biosciences (San Jose, CA, USA); Sigma-Aldrich (Saint Louis, Missouri, USA).

**Figure S1:** Western blot of *Matrix Metalloproteinase-9 (MMP9)* expression in six patients at different time of treatment with *rh-NGF*. Multiple exposure time points, as well as the full-length blots are shown in Figure S2 and S3.

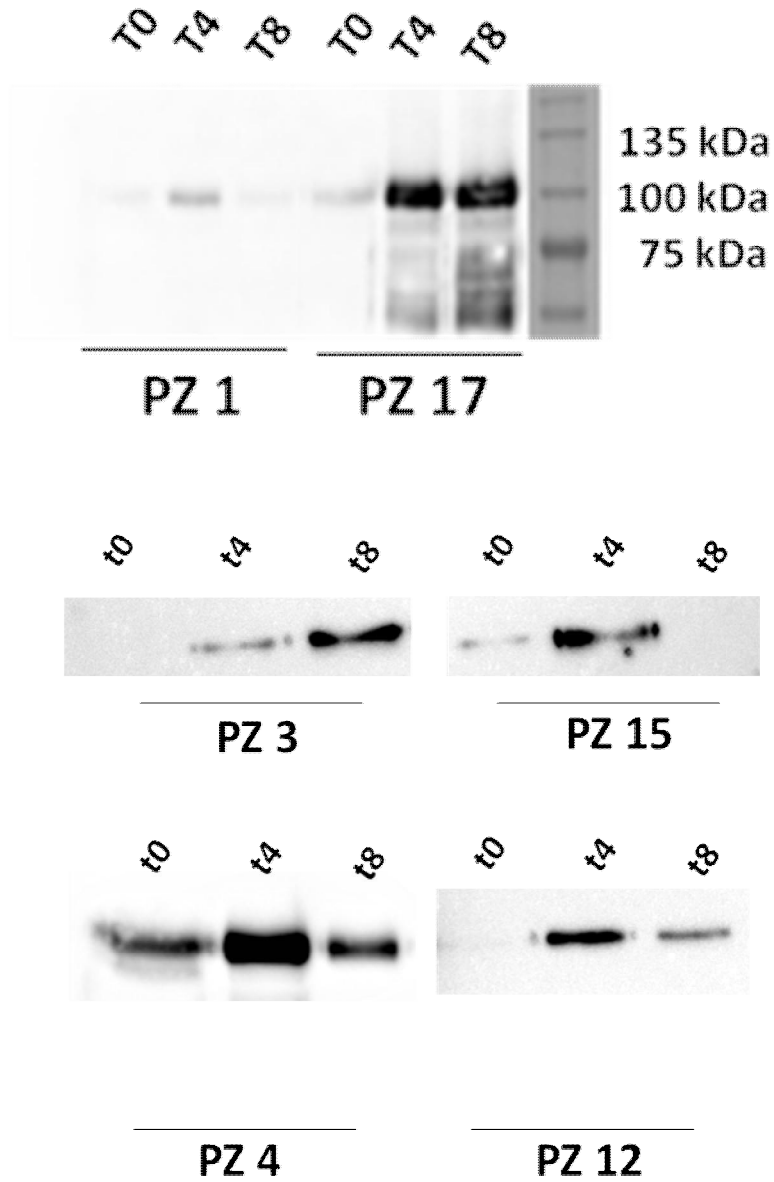

**Figure S2:** Full-length blot of *Matrix metalloproteinase-9 (MMP-9)* expression in two representative (pz 1 and 17) NK patients at T0, T4 and T8 timepoint during therapy (15ug of total proteins). Western Blot also shows protein molecular weights marker (Marker), a negative control (only medium) and a positive control (Sur neurons) for *MMP-9* expression (1 minute of exposure). The portion of the image discussed in Figure 3 Panel C of the main text is represented inside the rectangle. Results were obtained using a digital imaging system Alliance 4.7 (UVITEC, Cambridge, UK).

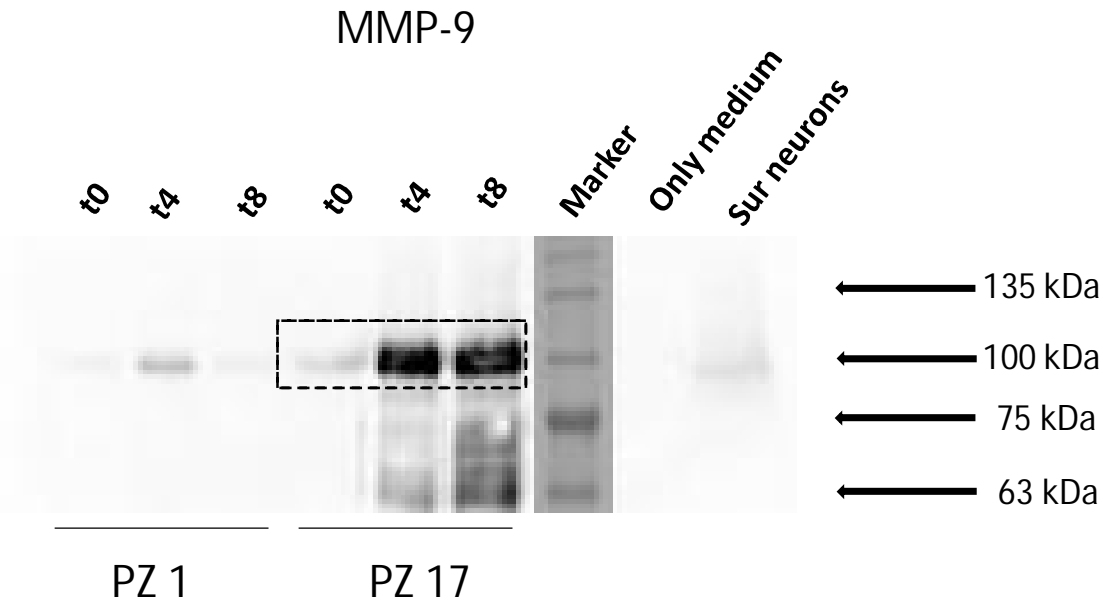

**Figure S3: Panel A** Full-length blot of *Matrix metalloproteinase-9 (MMP-9)* expression for patients 3-4-6-9-12-15 at T0, T4 and T8 timepoint during therapy (1 minute of exposure). **Panel B** Full-length blot of *Matrix metalloproteinase-9 (MMP-9)* expression (10 minutes of exposure) used to crop the image of patient 15. **Panel C** Full-length blot of *Matrix metalloproteinase-9 (MMP-9)* expression (5 seconds of exposure) used to crop the image of patient 4. **Panel D** Full-length blot of *Matrix metalloproteinase-9 (MMP-9)* expression (1 minute of exposure) used to crop the image of patients 3 and 12. The portions of the image discussed in Figure S2 are represented inside the rectangles. Results were obtained using a digital imaging system Alliance 4.7 (UVITEC, Cambridge, UK). Results of patients 6 and 9 were excluded from all processing as they showed anomalous data and no experimental repetitions were possible.

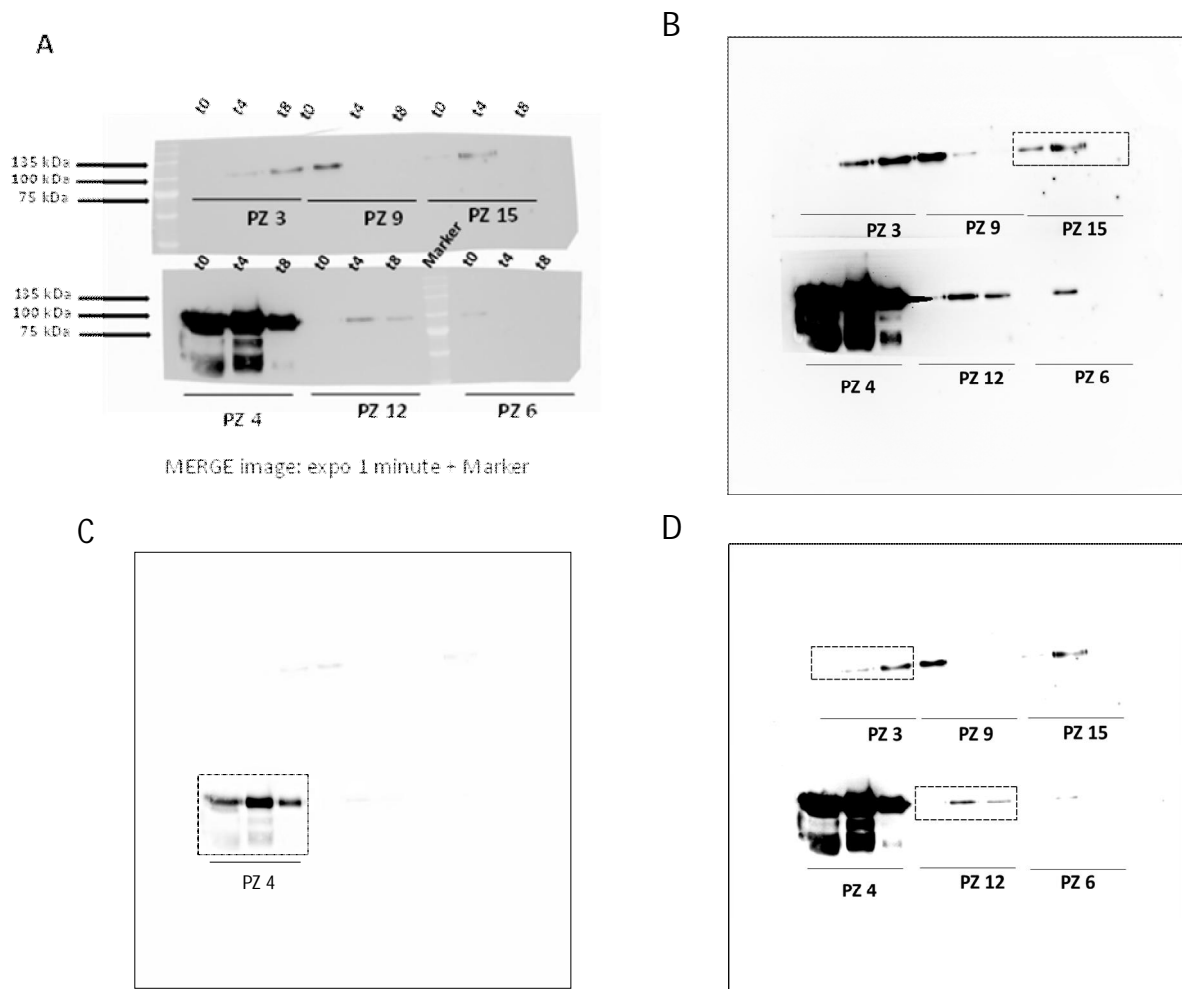

**Figure S4: Rank correlation of EVs count.** Spearman's coefficient of Rank correlation ( $\rho$ ) = 0.54 (p-value = 0.0068) between double positive EVs CD171+/CD126+ with EVs CD45+ in tears samples from patient collected before (T0) and after 4 (T4) and 8 (T8) weeks of treatment with *rhNGF*. The correlation was more driven by treated samples (T4 and T8, red and blue dots) than the naïve ones (T0, black dots), indicating the role of *rhNGF* in double positive EVs release and function.

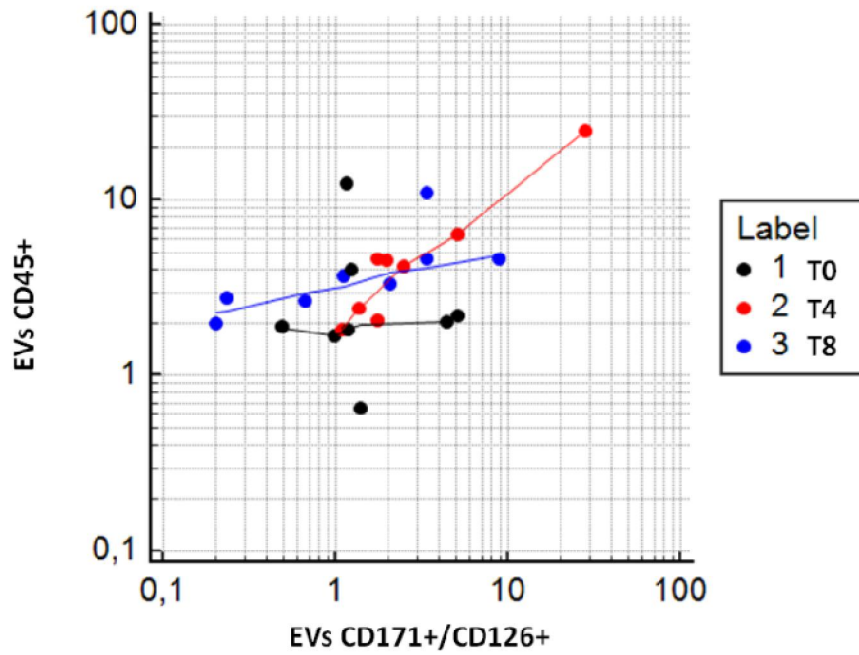

**Figure S5: correlation of proteins expression in the analyzed comparisons.** For both comparisons' protein expression is reported as density value of iBAQ: data points with the highest density are light blue, on the contrary data points with lowest density are bright green. The color gradient is report in the legend. While Panel A shows the correlation between protein expression in pooled tears at baseline (T0) and at 4-weeks follow up period (T4), Panel B points out the same correlation between T0 and at 8-weeks follow up period (T8).

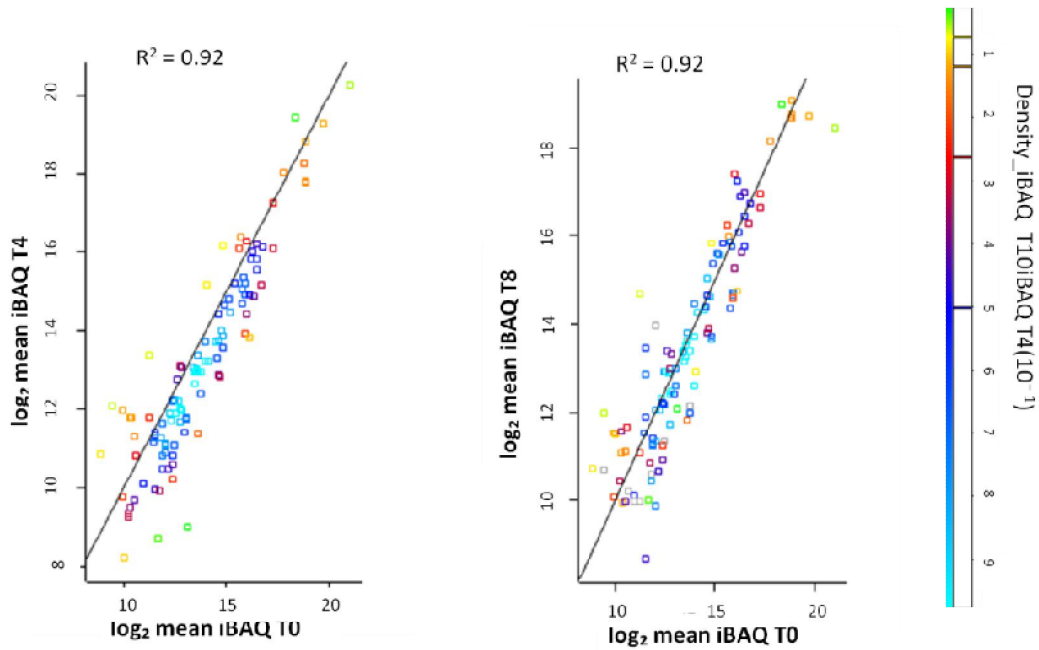

Supplement: 41598_2022_5229_MOESM1_ESM.pdf [file 41598_2022_5229_MOESM1_ESM.pdf]
